# Supplementary material for: Balloon tamponade for the management of postpartum uterine hemorrhage
Source: publisher site journal article supplement (doi:10.1515/jpm-2013-0336), 2014-03-25
Supplement: Supplementary file 1 [file SUPPLEMENTARY FIGURES AND VIDEOS.doc]

SUPPLEMENTARY FIGURES AND VIDEOS

Suppl Figure 1. Ultrasonographic visualization of lower segment atony

Suppl Figure 2. Magnetic Resonance Imaging of the Bakri balloon in sagittal section inflated with 600 ml saline in an atonic uterus.

Suppl Video 1. Bakri balloon was placed in an atonic uterus during cesarean section. After inflation Bakri balloon up to (400 ml), uterine incision was closed and Bakri balloon was further inflated up to 920 ml until the bleeding stopped in lithotomy position. The sutures of the uterine incision were checked before closure of the parietal peritoneum for a potential separation due to Bakri balloon.
